# Supplementary material for: Physical activity and screen time in outside school hours care services across Australia: current versus best practice
Source: Springer Nature journal article supplement (doi:10.1186/s12889-022-13135-7), 2022-04-07
Supplement: MOESM1 [file 20294044]

**Supplementary File 1: Australian physical activity and screen time guidelines for OSHC (16)**

| Session                   |  <b>Physical Activity</b>                                                                   |  <b>Screen Time*</b>                               |
|---------------------------|------------------------------------------------------------------------------------------------------------------------------------------------------------------------------|--------------------------------------------------------------------------------------------------------------------------------------|
| <b>Before School Care</b> | Schedule <b>45 minutes</b> of time for children to engage in a variety of physical activities including energetic play.<br><b>More is better.</b>                            | Discourage children from engaging with screens, with total screen time <b>no more than 30 minutes.</b><br><br><b>Less is better.</b> |
| <b>After School Care</b>  | Schedule <b>90 minutes (1.5 hours)</b> for children to engage in a variety of physical activity, including energetic play .<br><b>More is better.</b>                        | Discourage children from engaging with screens, with total screen time <b>no more than 60 minutes.</b><br><br><b>Less is better.</b> |
| <b>Vacation Care</b>      | Throughout the day schedule at least <b>2-3 hours of time</b> for children to engage in a variety of physical activity, including energetic play .<br><b>More is better.</b> | Discourage children from engaging with screens. <b>No more than 2 hours</b> over the entire day.<br><br><b>Less is better.</b>       |

\*does not include computer use for homework
