# Supplementary material for: Physical activity and screen time in outside school hours care services across Australia: current versus best practice
Source: Springer Nature journal article supplement (doi:10.1186/s12889-022-13135-7), 2022-04-07
Supplement: MOESM3 [file 20294044]

### Supplementary File 3: Post Hoc Testing for Physical Activity and Screen Time Scheduling

#### ONE WAY ANOVA ASSESSMENT OF PA TIME SCHEDULED BY SES TERTILE

|                 |                | ANOVA          |     |             |       |      |
|-----------------|----------------|----------------|-----|-------------|-------|------|
|                 |                | Sum of Squares | df  | Mean Square | F     | Sig. |
| BSC_totalP<br>A | Between Groups | 3980.841       | 2   | 1990.420    | 1.581 | .207 |
|                 | Within Groups  | 463326.572     | 368 | 1259.040    |       |      |
|                 | Total          | 467307.412     | 370 |             |       |      |
| ASC_totalP<br>A | Between Groups | 5539.342       | 2   | 2769.671    | 1.908 | .150 |
|                 | Within Groups  | 528442.675     | 364 | 1451.766    |       |      |
|                 | Total          | 533982.016     | 366 |             |       |      |

### Multiple Comparisons

Tukey HSD

| Dependent Variable | (I) SES_Index | (J) SES_Index | Mean Difference (I-J) | Std. Error | Sig. | 95% Confidence Interval |             |
|--------------------|---------------|---------------|-----------------------|------------|------|-------------------------|-------------|
|                    |               |               |                       |            |      | Lower Bound             | Upper Bound |
| BSC_totalIPA       | 1.00          | 2.00          | -7.76996              | 4.86309    | .248 | -19.2140                | 3.6740      |
|                    |               | 3.00          | -6.41786              | 4.32904    | .300 | -16.6051                | 3.7694      |
|                    | 2.00          | 1.00          | 7.76996               | 4.86309    | .248 | -3.6740                 | 19.2140     |
|                    |               | 3.00          | 1.35210               | 4.58809    | .953 | -9.4448                 | 12.1490     |
|                    | 3.00          | 1.00          | 6.41786               | 4.32904    | .300 | -3.7694                 | 16.6051     |
|                    |               | 2.00          | -1.35210              | 4.58809    | .953 | -12.1490                | 9.4448      |
| ASC_totalIPA       | 1.00          | 2.00          | -7.49823              | 5.10381    | .307 | -19.5092                | 4.5128      |
|                    |               | 3.00          | -8.46834              | 4.63967    | .163 | -19.3871                | 2.4504      |
|                    | 2.00          | 1.00          | 7.49823               | 5.10381    | .307 | -4.5128                 | 19.5092     |
|                    |               | 3.00          | -.97011               | 5.04093    | .980 | -12.8331                | 10.8929     |
|                    | 3.00          | 1.00          | 8.46834               | 4.63967    | .163 | -2.4504                 | 19.3871     |
|                    |               | 2.00          | .97011                | 5.04093    | .980 | -10.8929                | 12.8331     |

**ONE WAY ANOVA ASSESSMENT OF PA TIME SCHEDULED BY STATE**

|                 |                | <b>ANOVA</b>   |     |             |       |      |
|-----------------|----------------|----------------|-----|-------------|-------|------|
|                 |                | Sum of Squares | df  | Mean Square | F     | Sig. |
| BSC_totalP<br>A | Between Groups | 34641.673      | 7   | 4948.810    | 3.903 | .000 |
|                 | Within Groups  | 530023.820     | 418 | 1268.000    |       |      |
|                 | Total          | 564665.493     | 425 |             |       |      |
| ASC_totalP<br>A | Between Groups | 33527.056      | 7   | 4789.579    | 3.311 | .002 |
|                 | Within Groups  | 601719.583     | 416 | 1446.441    |       |      |
|                 | Total          | 635246.639     | 423 |             |       |      |

### Multiple Comparisons

Tukey HSD

| Dependent Variable | (I) state of Australia       | (J) state of Australia       | Mean Difference (I-J) | Std. Error | Sig.  | 95% Confidence Interval |             |
|--------------------|------------------------------|------------------------------|-----------------------|------------|-------|-------------------------|-------------|
|                    |                              |                              |                       |            |       | Lower Bound             | Upper Bound |
| BSC_totalPA        | Australian Capital Territory | New South Wales              | -8.58000              | 14.88211   | .999  | -53.9161                | 36.7561     |
|                    |                              | Northern Territory           | 16.50000              | 21.56231   | .995  | -49.1864                | 82.1864     |
|                    |                              | Queensland                   | -28.14706             | 15.04164   | .572  | -73.9692                | 17.6751     |
|                    |                              | South Australia              | -5.66038              | 14.94308   | 1.000 | -51.1822                | 39.8615     |
|                    |                              | Tasmania                     | -11.25000             | 19.23105   | .999  | -69.8345                | 47.3345     |
|                    |                              | Victoria                     | -9.46721              | 15.23549   | .999  | -55.8799                | 36.9454     |
|                    |                              | Western Australia            | -4.50000              | 15.92482   | 1.000 | -53.0126                | 44.0126     |
|                    | New South Wales              | Australian Capital Territory | 8.58000               | 14.88211   | .999  | -36.7561                | 53.9161     |
|                    |                              | Northern Territory           | 25.08000              | 16.24019   | .783  | -24.3933                | 74.5533     |
|                    |                              | Queensland                   | -19.56706*            | 5.00616    | .003  | -34.8176                | -4.3165     |
|                    |                              | South Australia              | 2.91962               | 4.70173    | .999  | -11.4035                | 17.2427     |
|                    |                              | Tasmania                     | -2.67000              | 12.98630   | 1.000 | -42.2308                | 36.8908     |
|                    |                              | Victoria                     | -.88721               | 5.56155    | 1.000 | -17.8297                | 16.0552     |
|                    |                              | Western Australia            | 4.08000               | 7.23952    | .999  | -17.9741                | 26.1341     |
|                    | Northern Territory           | Australian Capital Territory | -16.50000             | 21.56231   | .995  | -82.1864                | 49.1864     |
|                    |                              | New South Wales              | -25.08000             | 16.24019   | .783  | -74.5533                | 24.3933     |
|                    |                              | Queensland                   | -44.64706             | 16.38651   | .118  | -94.5661                | 5.2720      |
|                    |                              | South Australia              | -22.16038             | 16.29608   | .875  | -71.8040                | 27.4832     |
|                    |                              | Tasmania                     | -27.75000             | 20.30024   | .872  | -89.5917                | 34.0917     |

|                 |                              |            |          |       |          |         |
|-----------------|------------------------------|------------|----------|-------|----------|---------|
|                 | Victoria                     | -25.96721  | 16.56462 | .769  | -76.4289 | 24.4945 |
|                 | Western Australia            | -21.00000  | 17.20077 | .925  | -73.3996 | 31.3996 |
| Queensland      | Australian Capital Territory | 28.14706   | 15.04164 | .572  | -17.6751 | 73.9692 |
|                 | New South Wales              | 19.56706*  | 5.00616  | .003  | 4.3165   | 34.8176 |
|                 | Northern Territory           | 44.64706   | 16.38651 | .118  | -5.2720  | 94.5661 |
|                 | South Australia              | 22.48668*  | 5.18458  | .000  | 6.6926   | 38.2807 |
|                 | Tasmania                     | 16.89706   | 13.16881 | .905  | -23.2198 | 57.0139 |
|                 | Victoria                     | 18.67985*  | 5.97533  | .040  | .4769    | 36.8828 |
|                 | Western Australia            | 23.64706*  | 7.56203  | .039  | .6105    | 46.6837 |
| South Australia | Australian Capital Territory | 5.66038    | 14.94308 | 1.000 | -39.8615 | 51.1822 |
|                 | New South Wales              | -2.91962   | 4.70173  | .999  | -17.2427 | 11.4035 |
|                 | Northern Territory           | 22.16038   | 16.29608 | .875  | -27.4832 | 71.8040 |
|                 | Queensland                   | -22.48668* | 5.18458  | .000  | -38.2807 | -6.6926 |
|                 | Tasmania                     | -5.58962   | 13.05612 | 1.000 | -45.3631 | 34.1839 |
|                 | Victoria                     | -3.80684   | 5.72269  | .998  | -21.2402 | 13.6265 |
|                 | Western Australia            | 1.16038    | 7.36403  | 1.000 | -21.2730 | 23.5938 |
| Tasmania        | Australian Capital Territory | 11.25000   | 19.23105 | .999  | -47.3345 | 69.8345 |
|                 | New South Wales              | 2.67000    | 12.98630 | 1.000 | -36.8908 | 42.2308 |
|                 | Northern Territory           | 27.75000   | 20.30024 | .872  | -34.0917 | 89.5917 |
|                 | Queensland                   | -16.89706  | 13.16881 | .905  | -57.0139 | 23.2198 |
|                 | South Australia              | 5.58962    | 13.05612 | 1.000 | -34.1839 | 45.3631 |
|                 | Victoria                     | 1.78279    | 13.38980 | 1.000 | -39.0073 | 42.5728 |
|                 | Western Australia            | 6.75000    | 14.16921 | 1.000 | -36.4144 | 49.9144 |

|             |                              |                              |            |          |       |          |         |
|-------------|------------------------------|------------------------------|------------|----------|-------|----------|---------|
|             | Victoria                     | Australian Capital Territory | 9.46721    | 15.23549 | .999  | -36.9454 | 55.8799 |
|             |                              | New South Wales              | .88721     | 5.56155  | 1.000 | -16.0552 | 17.8297 |
|             |                              | Northern Territory           | 25.96721   | 16.56462 | .769  | -24.4945 | 76.4289 |
|             |                              | Queensland                   | -18.67985* | 5.97533  | .040  | -36.8828 | -.4769  |
|             |                              | South Australia              | 3.80684    | 5.72269  | .998  | -13.6265 | 21.2402 |
|             |                              | Tasmania                     | -1.78279   | 13.38980 | 1.000 | -42.5728 | 39.0073 |
|             |                              | Western Australia            | 4.96721    | 7.94063  | .999  | -19.2227 | 29.1572 |
|             | Western Australia            | Australian Capital Territory | 4.50000    | 15.92482 | 1.000 | -44.0126 | 53.0126 |
|             |                              | New South Wales              | -4.08000   | 7.23952  | .999  | -26.1341 | 17.9741 |
|             |                              | Northern Territory           | 21.00000   | 17.20077 | .925  | -31.3996 | 73.3996 |
|             |                              | Queensland                   | -23.64706* | 7.56203  | .039  | -46.6837 | -.6105  |
|             |                              | South Australia              | -1.16038   | 7.36403  | 1.000 | -23.5938 | 21.2730 |
|             |                              | Tasmania                     | -6.75000   | 14.16921 | 1.000 | -49.9144 | 36.4144 |
|             |                              | Victoria                     | -4.96721   | 7.94063  | .999  | -29.1572 | 19.2227 |
| ASC_totalPA | Australian Capital Territory | New South Wales              | 23.34677   | 13.87336 | .698  | -18.9174 | 65.6109 |
|             |                              | Northern Territory           | 31.60714   | 19.68349 | .747  | -28.3571 | 91.5714 |
|             |                              | Queensland                   | 26.43293   | 14.08704 | .568  | -16.4822 | 69.3481 |
|             |                              | South Australia              | 31.52228   | 13.96876 | .320  | -11.0325 | 74.0771 |
|             |                              | Tasmania                     | -23.75000  | 20.53969 | .944  | -86.3226 | 38.8226 |
|             |                              | Victoria                     | 37.10821   | 14.22652 | .156  | -6.2318  | 80.4483 |
|             |                              | Western Australia            | 19.78448   | 15.18823 | .898  | -26.4854 | 66.0543 |
|             | New South Wales              | Australian Capital Territory | -23.34677  | 13.87336 | .698  | -65.6109 | 18.9174 |
|             |                              | Northern Territory           | 8.26037    | 14.77496 | .999  | -36.7504 | 53.2712 |

|                    |                              |            |          |       |           |         |
|--------------------|------------------------------|------------|----------|-------|-----------|---------|
|                    | Queensland                   | 3.08615    | 5.41335  | .999  | -13.4052  | 19.5775 |
|                    | South Australia              | 8.17550    | 5.09765  | .748  | -7.3541   | 23.7051 |
|                    | Tasmania                     | -47.09677  | 15.89775 | .063  | -95.5281  | 1.3345  |
|                    | Victoria                     | 13.76143   | 5.76659  | .251  | -3.8060   | 31.3289 |
|                    | Western Australia            | -3.56229   | 7.84488  | 1.000 | -27.4611  | 20.3366 |
| Northern Territory | Australian Capital Territory | -31.60714  | 19.68349 | .747  | -91.5714  | 28.3571 |
|                    | New South Wales              | -8.26037   | 14.77496 | .999  | -53.2712  | 36.7504 |
|                    | Queensland                   | -5.17422   | 14.97578 | 1.000 | -50.7968  | 40.4484 |
|                    | South Australia              | -.08487    | 14.86458 | 1.000 | -45.3687  | 45.1990 |
|                    | Tasmania                     | -55.35714  | 21.15911 | .153  | -119.8168 | 9.1025  |
|                    | Victoria                     | 5.50107    | 15.10706 | 1.000 | -40.5215  | 51.5236 |
|                    | Western Australia            | -11.82266  | 16.01598 | .996  | -60.6142  | 36.9689 |
| Queensland         | Australian Capital Territory | -26.43293  | 14.08704 | .568  | -69.3481  | 16.4822 |
|                    | New South Wales              | -3.08615   | 5.41335  | .999  | -19.5775  | 13.4052 |
|                    | Northern Territory           | 5.17422    | 14.97578 | 1.000 | -40.4484  | 50.7968 |
|                    | South Australia              | 5.08935    | 5.65338  | .986  | -12.1333  | 22.3120 |
|                    | Tasmania                     | -50.18293* | 16.08456 | .040  | -99.1834  | -1.1825 |
|                    | Victoria                     | 10.67528   | 6.26324  | .684  | -8.4052   | 29.7558 |
|                    | Western Australia            | -6.64844   | 8.21686  | .993  | -31.6805  | 18.3836 |
| South Australia    | Australian Capital Territory | -31.52228  | 13.96876 | .320  | -74.0771  | 11.0325 |
|                    | New South Wales              | -8.17550   | 5.09765  | .748  | -23.7051  | 7.3541  |
|                    | Northern Territory           | .08487     | 14.86458 | 1.000 | -45.1990  | 45.3687 |
|                    | Queensland                   | -5.08935   | 5.65338  | .986  | -22.3120  | 12.1333 |

|                   |                              |            |          |       |           |          |
|-------------------|------------------------------|------------|----------|-------|-----------|----------|
|                   | Tasmania                     | -55.27228* | 15.98107 | .014  | -103.9574 | -6.5871  |
|                   | Victoria                     | 5.58593    | 5.99249  | .983  | -12.6697  | 23.8416  |
|                   | Western Australia            | -11.73779  | 8.01240  | .826  | -36.1470  | 12.6714  |
| Tasmania          | Australian Capital Territory | 23.75000   | 20.53969 | .944  | -38.8226  | 86.3226  |
|                   | New South Wales              | 47.09677   | 15.89775 | .063  | -1.3345   | 95.5281  |
|                   | Northern Territory           | 55.35714   | 21.15911 | .153  | -9.1025   | 119.8168 |
|                   | Queensland                   | 50.18293*  | 16.08456 | .040  | 1.1825    | 99.1834  |
|                   | South Australia              | 55.27228*  | 15.98107 | .014  | 6.5871    | 103.9574 |
|                   | Victoria                     | 60.85821*  | 16.20686 | .005  | 11.4852   | 110.2312 |
|                   | Western Australia            | 43.53448   | 17.05728 | .177  | -8.4293   | 95.4982  |
| Victoria          | Australian Capital Territory | -37.10821  | 14.22652 | .156  | -80.4483  | 6.2318   |
|                   | New South Wales              | -13.76143  | 5.76659  | .251  | -31.3289  | 3.8060   |
|                   | Northern Territory           | -5.50107   | 15.10706 | 1.000 | -51.5236  | 40.5215  |
|                   | Queensland                   | -10.67528  | 6.26324  | .684  | -29.7558  | 8.4052   |
|                   | South Australia              | -5.58593   | 5.99249  | .983  | -23.8416  | 12.6697  |
|                   | Tasmania                     | -60.85821* | 16.20686 | .005  | -110.2312 | -11.4852 |
|                   | Western Australia            | -17.32373  | 8.45375  | .450  | -43.0775  | 8.4300   |
| Western Australia | Australian Capital Territory | -19.78448  | 15.18823 | .898  | -66.0543  | 26.4854  |
|                   | New South Wales              | 3.56229    | 7.84488  | 1.000 | -20.3366  | 27.4611  |
|                   | Northern Territory           | 11.82266   | 16.01598 | .996  | -36.9689  | 60.6142  |
|                   | Queensland                   | 6.64844    | 8.21686  | .993  | -18.3836  | 31.6805  |
|                   | South Australia              | 11.73779   | 8.01240  | .826  | -12.6714  | 36.1470  |
|                   | Tasmania                     | -43.53448  | 17.05728 | .177  | -95.4982  | 8.4293   |



|          |          |         |      |         |         |
|----------|----------|---------|------|---------|---------|
| Victoria | 17.32373 | 8.45375 | .450 | -8.4300 | 43.0775 |
|----------|----------|---------|------|---------|---------|

\*. The mean difference is significant at the 0.05 level.

## KRUSKAL – WALLIS TESTING OF ST TIME SCHEDULED BY SES TERTILE

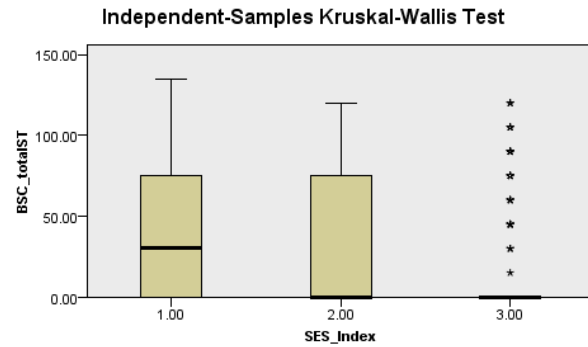

|                                       |        |
|---------------------------------------|--------|
| <b>Total N</b>                        | 371    |
| <b>Test Statistic</b>                 | 24.490 |
| <b>Degrees of Freedom</b>             | 2      |
| <b>Asymptotic Sig. (2-sided test)</b> | .000   |

1. The test statistic is adjusted for ties.

**Pairwise Comparisons of SES\_Index**

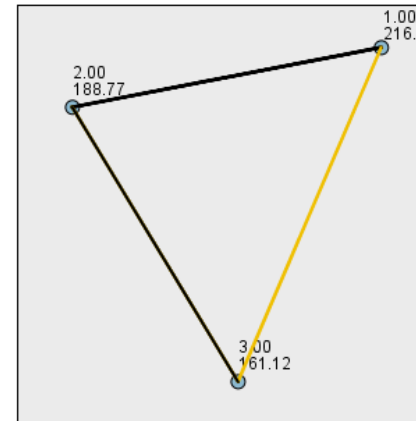

Each node shows the sample average rank of SES\_Index.

| Sample1-Sample2 | Test Statistic | Std. Error | Std. Test Statistic | Sig. | Adj.Sig. |
|-----------------|----------------|------------|---------------------|------|----------|
| 3.00-2.00       | 27.655         | 11.914     | 2.321               | .020 | .061     |
| 3.00-1.00       | 55.496         | 11.242     | 4.937               | .000 | .000     |
| 2.00-1.00       | 27.841         | 12.628     | 2.205               | .027 | .082     |

Each row tests the null hypothesis that the Sample 1 and Sample 2 distributions are the same. Asymptotic significances (2-sided tests) are displayed. The significance level is .05. Significance values have been adjusted by the Bonferroni correction for multiple tests.

**BSC ST**

### Independent-Samples Kruskal-Wallis Test

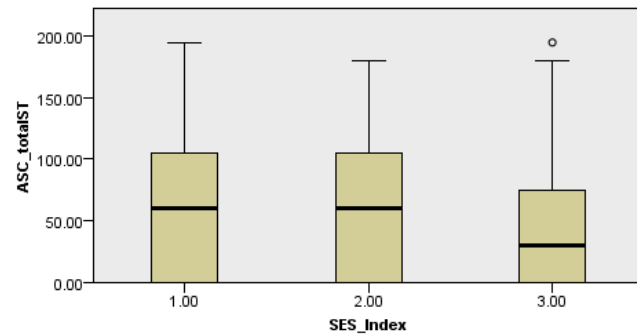

|                                       |       |
|---------------------------------------|-------|
| <b>Total N</b>                        | 367   |
| <b>Test Statistic</b>                 | 6.694 |
| <b>Degrees of Freedom</b>             | 2     |
| <b>Asymptotic Sig. (2-sided test)</b> | .035  |

1. The test statistic is adjusted for ties.

### Pairwise Comparisons of SES\_Index

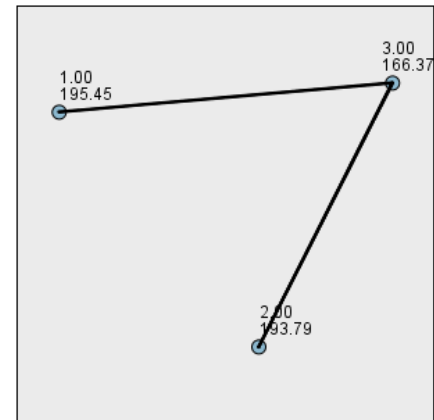

Each node shows the sample average rank of SES\_Index.

| Sample1-Sample2 | Test Statistic | Std. Error | Std. Test Statistic | Sig. | Adj.Sig. |
|-----------------|----------------|------------|---------------------|------|----------|
| 3.00-2.00       | 27.415         | 13.496     | 2.031               | .042 | .127     |
| 3.00-1.00       | 29.080         | 12.422     | 2.341               | .019 | .058     |
| 2.00-1.00       | 1.666          | 13.665     | .122                | .903 | 1.000    |

Each row tests the null hypothesis that the Sample 1 and Sample 2 distributions are the same. Asymptotic significances (2-sided tests) are displayed. The significance level is .05. Significance values have been adjusted by the Bonferroni correction for multiple tests.

**ASC ST**

# KRUSKAL – WALLIS TESTING OF ST TIME SCHEDULED BY STATE

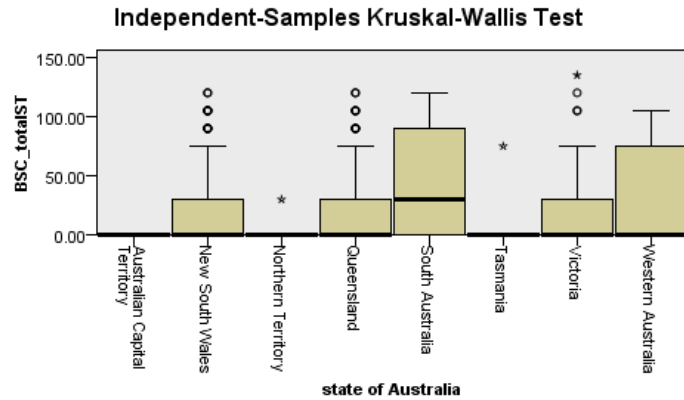

|                                       |        |
|---------------------------------------|--------|
| <b>Total N</b>                        | 426    |
| <b>Test Statistic</b>                 | 30.565 |
| <b>Degrees of Freedom</b>             | 7      |
| <b>Asymptotic Sig. (2-sided test)</b> | .000   |

1. The test statistic is adjusted for ties.

Pairwise Comparisons of state of Australia

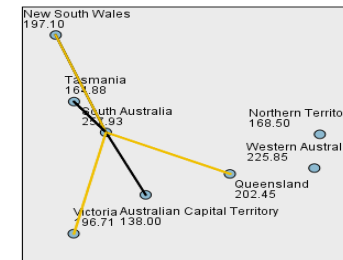

Each node shows the sample average rank of state of Australia.

| Sample1-Sample2                                 | Test Statistic | Std. Error | Std. Test Statistic | Sig. | Adj. Sig. |
|-------------------------------------------------|----------------|------------|---------------------|------|-----------|
| Australian Capital Territory-Tasmania           | -26.875        | 56.813     | -.473               | .636 | 1.000     |
| Australian Capital Territory-Northern Territory | -30.500        | 63.700     | -.479               | .632 | 1.000     |
| Australian Capital Territory-Victoria           | -58.713        | 45.009     | -1.304              | .192 | 1.000     |
| Australian Capital Territory-New South Wales    | -59.100        | 43.965     | -1.344              | .179 | 1.000     |
| Australian Capital Territory-Queensland         | -64.453        | 44.436     | -1.450              | .147 | 1.000     |
| Australian Capital Territory-Western Australia  | -87.850        | 47.046     | -1.867              | .062 | 1.000     |
| Australian Capital Territory-South Australia    | -119.929       | 44.145     | -2.717              | .007 | .185      |
| Tasmania-Northern Territory                     | 3.625          | 59.972     | .060                | .952 | 1.000     |
| Tasmania-Victoria                               | -31.838        | 39.557     | -.805               | .421 | 1.000     |
| Tasmania-New South Wales                        | 32.225         | 38.364     | .840                | .401 | 1.000     |
| Tasmania-Queensland                             | 37.578         | 38.904     | .966                | .334 | 1.000     |
| Tasmania-Western Australia                      | -60.975        | 41.859     | -1.457              | .145 | 1.000     |
| Tasmania-South Australia                        | 93.054         | 38.571     | 2.413               | .016 | .444      |
| Northern Territory-Victoria                     | -28.213        | 48.936     | -.577               | .564 | 1.000     |
| Northern Territory-New South Wales              | 28.600         | 47.977     | .596                | .551 | 1.000     |
| Northern Territory-Queensland                   | -33.953        | 48.409     | -.701               | .483 | 1.000     |
| Northern Territory-Western Australia            | -57.350        | 50.815     | -1.129              | .259 | 1.000     |
| Northern Territory-South Australia              | -89.429        | 48.142     | -1.858              | .063 | 1.000     |
| Victoria-New South Wales                        | .387           | 16.430     | .024                | .981 | 1.000     |
| Victoria-Queensland                             | 5.740          | 17.652     | .325                | .745 | 1.000     |
| Victoria-Western Australia                      | -29.137        | 23.458     | -1.242              | .214 | 1.000     |
| Victoria-South Australia                        | 61.216         | 16.906     | 3.621               | .000 | .008      |
| New South Wales-Queensland                      | -5.353         | 14.789     | -.362               | .717 | 1.000     |
| New South Wales-Western Australia               | -28.750        | 21.387     | -1.344              | .179 | 1.000     |
| New South Wales-South Australia                 | -60.829        | 13.890     | -4.379              | .000 | .000      |
| Queensland-Western Australia                    | -23.397        | 22.340     | -1.047              | .295 | 1.000     |
| Queensland-South Australia                      | -55.476        | 15.316     | -3.622              | .000 | .008      |
| Western Australia-South Australia               | 32.079         | 21.755     | 1.475               | .140 | 1.000     |

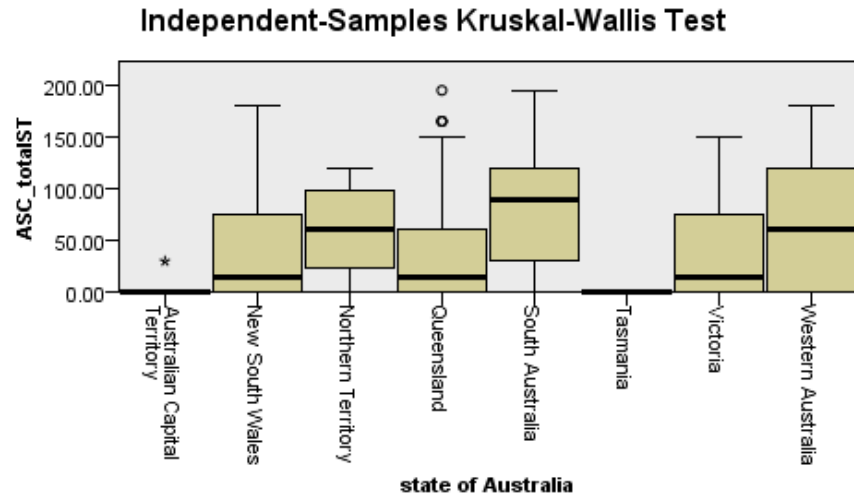

|                                       |        |
|---------------------------------------|--------|
| <b>Total N</b>                        | 424    |
| <b>Test Statistic</b>                 | 48.843 |
| <b>Degrees of Freedom</b>             | 7      |
| <b>Asymptotic Sig. (2-sided test)</b> | .000   |

1. The test statistic is adjusted for ties.

Pairwise Comparisons of state of Australia

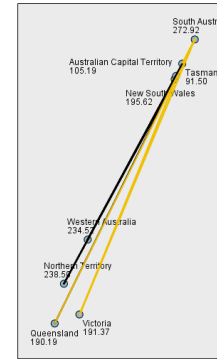

Each node shows the sample average rank of state of Australia.

| Sample1-Sample2                                 | Test Statistic | Std. Error | Std. Test Statistic | Sig. | Adj. Sig. |
|-------------------------------------------------|----------------|------------|---------------------|------|-----------|
| Tasmania-Australian Capital Territory           | 13.688         | 63.417     | .216                | .829 | 1.000     |
| Tasmania-Queensland                             | 98.689         | 49.661     | 1.987               | .047 | 1.000     |
| Tasmania-Victoria                               | -99.873        | 50.039     | -1.996              | .046 | 1.000     |
| Tasmania-New South Wales                        | 104.121        | 49.085     | 2.121               | .034 | .949      |
| Tasmania-Western Australia                      | -143.017       | 52.665     | -2.716              | .007 | .185      |
| Tasmania-Northern Territory                     | 147.000        | 65.329     | 2.250               | .024 | .684      |
| Tasmania-South Australia                        | 181.416        | 49.342     | 3.677               | .000 | .007      |
| Australian Capital Territory-Queensland         | -85.002        | 43.494     | -1.954              | .051 | 1.000     |
| Australian Capital Territory-Victoria           | -86.186        | 43.925     | -1.962              | .050 | 1.000     |
| Australian Capital Territory-New South Wales    | -90.433        | 42.834     | -2.111              | .035 | .973      |
| Australian Capital Territory-Western Australia  | -129.330       | 46.894     | -2.758              | .006 | .163      |
| Australian Capital Territory-Northern Territory | -133.312       | 60.773     | -2.194              | .028 | .791      |
| Australian Capital Territory-South Australia    | -167.728       | 43.129     | -3.889              | .000 | .003      |
| Queensland-Victoria                             | -1.184         | 19.338     | -.061               | .951 | 1.000     |
| Queensland-New South Wales                      | 5.432          | 16.714     | .325                | .745 | 1.000     |
| Queensland-Western Australia                    | -44.328        | 25.370     | -1.747              | .081 | 1.000     |
| Queensland-Northern Territory                   | 48.311         | 46.238     | 1.045               | .296 | 1.000     |
| Queensland-South Australia                      | -82.727        | 17.455     | -4.739              | .000 | .000      |
| Victoria-New South Wales                        | 4.248          | 17.804     | .239                | .811 | 1.000     |
| Victoria-Western Australia                      | -43.144        | 26.101     | -1.653              | .098 | 1.000     |
| Victoria-Northern Territory                     | 47.127         | 46.643     | 1.010               | .312 | 1.000     |
| Victoria-South Australia                        | 81.543         | 18.502     | 4.407               | .000 | .000      |
| New South Wales-Western Australia               | -38.896        | 24.221     | -1.606              | .108 | 1.000     |
| New South Wales-Northern Territory              | -42.879        | 45.618     | -.940               | .347 | 1.000     |
| New South Wales-South Australia                 | -77.295        | 15.739     | -4.911              | .000 | .000      |
| Western Australia-Northern Territory            | 3.983          | 49.450     | .081                | .936 | 1.000     |
| Western Australia-South Australia               | 38.399         | 24.738     | 1.552               | .121 | 1.000     |
| Northern Territory-South Australia              | -34.416        | 45.895     | -.750               | .453 | 1.000     |

Each row tests the null hypothesis that the Sample 1 and Sample 2 distributions are the same. Asymptotic significances (2-sided tests) are displayed. The significance level is .05. Significance values have been adjusted by the Bonferroni correction for multiple tests.
