# Supplementary material for: Physical activity and screen time in outside school hours care services across Australia: current versus best practice
Source: Springer Nature journal article supplement (doi:10.1186/s12889-022-13135-7), 2022-04-07

**Supplementary File 4: Feedback on draft guidelines**

Feedback on draft guidelines

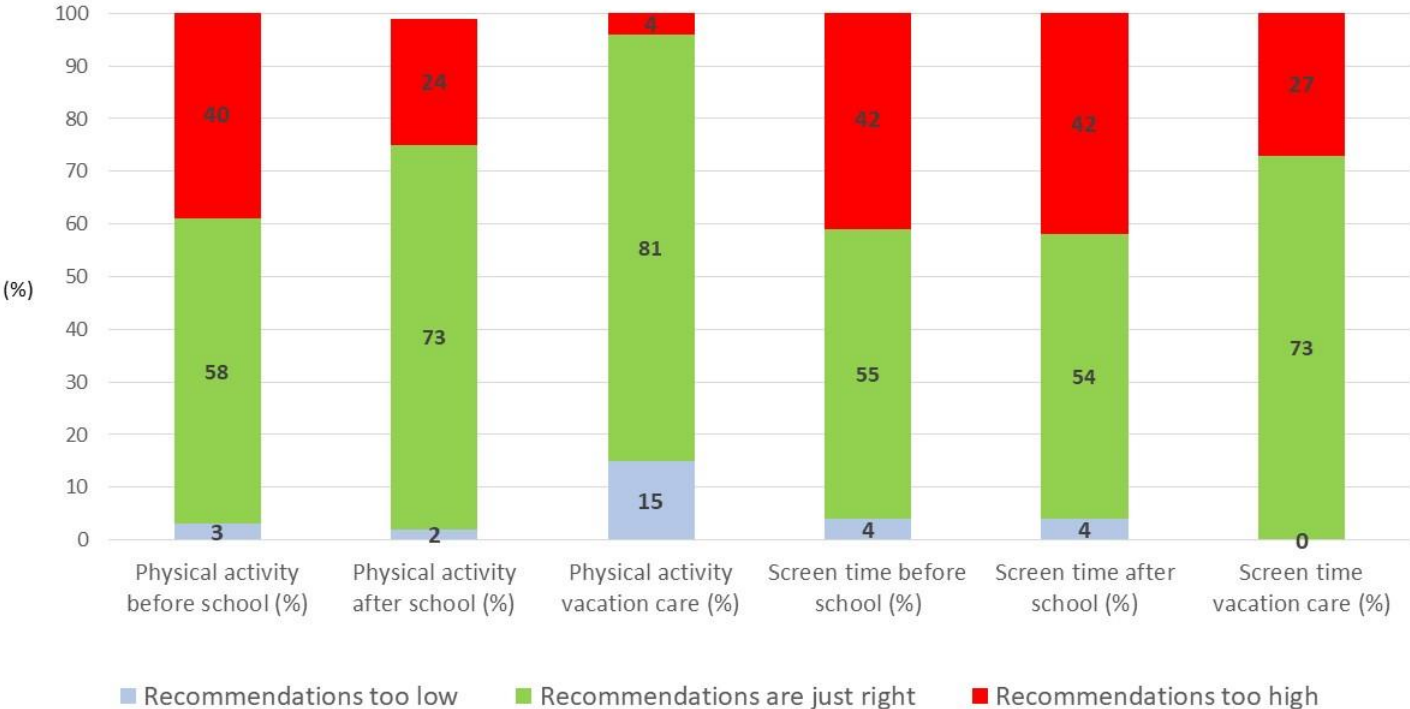

Supplement: MOESM4 [file 20294044]
