# Supplementary material for: Physical activity and screen time in outside school hours care services across Australia: current versus best practice
Source: Springer Nature journal article supplement (doi:10.1186/s12889-022-13135-7), 2022-04-07
Supplement: MOESM5 [file 20294044]

**Supplementary File 5: Post Hoc testing meeting guidelines**

**ANOVA by STATE FOR MEETING INDIVIDUAL GUIDELINES and TOTAL COMPLIANCE**

|                                  |                | <b>ANOVA</b>   |     |             |       |      |
|----------------------------------|----------------|----------------|-----|-------------|-------|------|
|                                  |                | Sum of Squares | df  | Mean Square | F     | Sig. |
| compliance with BSC ST guideline | Between Groups | 4.492          | 7   | .642        | 3.284 | .002 |
|                                  | Within Groups  | 69.956         | 358 | .195        |       |      |
|                                  | Total          | 74.448         | 365 |             |       |      |
| compliance with BSC PA guideline | Between Groups | 2.227          | 7   | .318        | 1.984 | .056 |
|                                  | Within Groups  | 57.404         | 358 | .160        |       |      |
|                                  | Total          | 59.631         | 365 |             |       |      |
| compliance with ASC ST guideline | Between Groups | 8.119          | 7   | 1.160       | 5.301 | .000 |
|                                  | Within Groups  | 78.330         | 358 | .219        |       |      |
|                                  | Total          | 86.448         | 365 |             |       |      |
| compliance with ASC PA guideline | Between Groups | .205           | 7   | .029        | .372  | .918 |
|                                  | Within Groups  | 28.169         | 358 | .079        |       |      |
|                                  | Total          | 28.374         | 365 |             |       |      |
| number of guidelines met         | Between Groups | 33.859         | 7   | 4.837       | 6.067 | .000 |
|                                  | Within Groups  | 285.441        | 358 | .797        |       |      |
|                                  | Total          | 319.301        | 365 |             |       |      |

### Multiple Comparisons

Tukey HSD

| Dependent Variable                  | (I) state of Australia       | (J) state of Australia       | Mean Difference (I-J) | Std. Error | Sig.  | 95% Confidence Interval |             |
|-------------------------------------|------------------------------|------------------------------|-----------------------|------------|-------|-------------------------|-------------|
|                                     |                              |                              |                       |            |       | Lower Bound             | Upper Bound |
| compliance with BSC<br>ST guideline | Australian Capital Territory | New South Wales              | .240                  | .202       | .935  | -.38                    | .86         |
|                                     |                              | Northern Territory           | .000                  | .280       | 1.000 | -.85                    | .85         |
|                                     |                              | Queensland                   | .227                  | .204       | .954  | -.40                    | .85         |
|                                     |                              | South Australia              | .442                  | .203       | .367  | -.18                    | 1.06        |
|                                     |                              | Tasmania                     | .000                  | .268       | 1.000 | -.82                    | .82         |
|                                     |                              | Victoria                     | .216                  | .207       | .968  | -.42                    | .85         |
|                                     |                              | Western Australia            | .360                  | .217       | .712  | -.30                    | 1.02        |
|                                     | New South Wales              | Australian Capital Territory | -.240                 | .202       | .935  | -.86                    | .38         |
|                                     |                              | Northern Territory           | -.240                 | .202       | .935  | -.86                    | .38         |
|                                     |                              | Queensland                   | -.014                 | .067       | 1.000 | -.22                    | .19         |
|                                     |                              | South Australia              | .202*                 | .063       | .031  | .01                     | .39         |
|                                     |                              | Tasmania                     | -.240                 | .186       | .900  | -.81                    | .33         |
|                                     |                              | Victoria                     | -.025                 | .076       | 1.000 | -.26                    | .21         |
|                                     |                              | Western Australia            | .120                  | .098       | .927  | -.18                    | .42         |
|                                     | Northern Territory           | Australian Capital Territory | .000                  | .280       | 1.000 | -.85                    | .85         |
|                                     |                              | New South Wales              | .240                  | .202       | .935  | -.38                    | .86         |
|                                     |                              | Queensland                   | .227                  | .204       | .954  | -.40                    | .85         |
|                                     |                              | South Australia              | .442                  | .203       | .367  | -.18                    | 1.06        |

|                 |                              |        |      |       |       |      |
|-----------------|------------------------------|--------|------|-------|-------|------|
|                 | Tasmania                     | .000   | .268 | 1.000 | -.82  | .82  |
|                 | Victoria                     | .216   | .207 | .968  | -.42  | .85  |
|                 | Western Australia            | .360   | .217 | .712  | -.30  | 1.02 |
| Queensland      | Australian Capital Territory | -.227  | .204 | .954  | -.85  | .40  |
|                 | New South Wales              | .014   | .067 | 1.000 | -.19  | .22  |
|                 | Northern Territory           | -.227  | .204 | .954  | -.85  | .40  |
|                 | South Australia              | .215*  | .068 | .037  | .01   | .42  |
|                 | Tasmania                     | -.227  | .188 | .929  | -.80  | .35  |
|                 | Victoria                     | -.011  | .080 | 1.000 | -.26  | .23  |
|                 | Western Australia            | .133   | .102 | .896  | -.18  | .44  |
| South Australia | Australian Capital Territory | -.442  | .203 | .367  | -1.06 | .18  |
|                 | New South Wales              | -.202* | .063 | .031  | -.39  | -.01 |
|                 | Northern Territory           | -.442  | .203 | .367  | -1.06 | .18  |
|                 | Queensland                   | -.215* | .068 | .037  | -.42  | -.01 |
|                 | Tasmania                     | -.442  | .186 | .256  | -1.01 | .13  |
|                 | Victoria                     | -.226  | .077 | .066  | -.46  | .01  |
|                 | Western Australia            | -.082  | .099 | .992  | -.39  | .22  |
| Tasmania        | Australian Capital Territory | .000   | .268 | 1.000 | -.82  | .82  |
|                 | New South Wales              | .240   | .186 | .900  | -.33  | .81  |
|                 | Northern Territory           | .000   | .268 | 1.000 | -.82  | .82  |
|                 | Queensland                   | .227   | .188 | .929  | -.35  | .80  |
|                 | South Australia              | .442   | .186 | .256  | -.13  | 1.01 |
|                 | Victoria                     | .216   | .191 | .950  | -.37  | .80  |

|                                     |                              |                              |       |      |       |       |      |
|-------------------------------------|------------------------------|------------------------------|-------|------|-------|-------|------|
|                                     | Victoria                     | Western Australia            | .360  | .201 | .626  | -.25  | .97  |
|                                     |                              | Australian Capital Territory | -.216 | .207 | .968  | -.85  | .42  |
|                                     |                              | New South Wales              | .025  | .076 | 1.000 | -.21  | .26  |
|                                     |                              | Northern Territory           | -.216 | .207 | .968  | -.85  | .42  |
|                                     |                              | Queensland                   | .011  | .080 | 1.000 | -.23  | .26  |
|                                     |                              | South Australia              | .226  | .077 | .066  | -.01  | .46  |
|                                     |                              | Tasmania                     | -.216 | .191 | .950  | -.80  | .37  |
|                                     |                              | Western Australia            | .144  | .108 | .884  | -.18  | .47  |
|                                     | Western Australia            | Australian Capital Territory | -.360 | .217 | .712  | -1.02 | .30  |
|                                     |                              | New South Wales              | -.120 | .098 | .927  | -.42  | .18  |
|                                     |                              | Northern Territory           | -.360 | .217 | .712  | -1.02 | .30  |
|                                     |                              | Queensland                   | -.133 | .102 | .896  | -.44  | .18  |
|                                     |                              | South Australia              | .082  | .099 | .992  | -.22  | .39  |
|                                     |                              | Tasmania                     | -.360 | .201 | .626  | -.97  | .25  |
| compliance with BSC<br>PA guideline | Australian Capital Territory | Victoria                     | -.144 | .108 | .884  | -.47  | .18  |
|                                     |                              | New South Wales              | .050  | .183 | 1.000 | -.51  | .61  |
|                                     |                              | Northern Territory           | .400  | .253 | .762  | -.37  | 1.17 |
|                                     |                              | Queensland                   | -.080 | .185 | 1.000 | -.64  | .48  |
|                                     |                              | South Australia              | .032  | .184 | 1.000 | -.53  | .59  |
|                                     |                              | Tasmania                     | -.200 | .242 | .992  | -.94  | .54  |
|                                     |                              | Victoria                     | -.063 | .188 | 1.000 | -.63  | .51  |
|                                     | New South Wales              | Western Australia            | .080  | .196 | 1.000 | -.52  | .68  |
|                                     |                              | Australian Capital Territory | -.050 | .183 | 1.000 | -.61  | .51  |

|                    |                              |       |      |       |       |      |
|--------------------|------------------------------|-------|------|-------|-------|------|
|                    | Northern Territory           | .350  | .183 | .546  | -.21  | .91  |
|                    | Queensland                   | -.130 | .061 | .389  | -.31  | .05  |
|                    | South Australia              | -.018 | .057 | 1.000 | -.19  | .15  |
|                    | Tasmania                     | -.250 | .168 | .814  | -.76  | .26  |
|                    | Victoria                     | -.113 | .068 | .721  | -.32  | .10  |
|                    | Western Australia            | .030  | .089 | 1.000 | -.24  | .30  |
| Northern Territory | Australian Capital Territory | -.400 | .253 | .762  | -1.17 | .37  |
|                    | New South Wales              | -.350 | .183 | .546  | -.91  | .21  |
|                    | Queensland                   | -.480 | .185 | .161  | -1.04 | .08  |
|                    | South Australia              | -.368 | .184 | .480  | -.93  | .19  |
|                    | Tasmania                     | -.600 | .242 | .210  | -1.34 | .14  |
|                    | Victoria                     | -.463 | .188 | .214  | -1.03 | .11  |
|                    | Western Australia            | -.320 | .196 | .731  | -.92  | .28  |
| Queensland         | Australian Capital Territory | .080  | .185 | 1.000 | -.48  | .64  |
|                    | New South Wales              | .130  | .061 | .389  | -.05  | .31  |
|                    | Northern Territory           | .480  | .185 | .161  | -.08  | 1.04 |
|                    | South Australia              | .112  | .062 | .618  | -.08  | .30  |
|                    | Tasmania                     | -.120 | .170 | .997  | -.64  | .40  |
|                    | Victoria                     | .017  | .073 | 1.000 | -.20  | .24  |
|                    | Western Australia            | .160  | .092 | .667  | -.12  | .44  |
| South Australia    | Australian Capital Territory | -.032 | .184 | 1.000 | -.59  | .53  |
|                    | New South Wales              | .018  | .057 | 1.000 | -.15  | .19  |
|                    | Northern Territory           | .368  | .184 | .480  | -.19  | .93  |

|                   |                              |       |      |       |      |      |
|-------------------|------------------------------|-------|------|-------|------|------|
|                   | Queensland                   | -.112 | .062 | .618  | -.30 | .08  |
|                   | Tasmania                     | -.232 | .169 | .869  | -.75 | .28  |
|                   | Victoria                     | -.094 | .070 | .876  | -.31 | .12  |
|                   | Western Australia            | .048  | .090 | .999  | -.23 | .32  |
| Tasmania          | Australian Capital Territory | .200  | .242 | .992  | -.54 | .94  |
|                   | New South Wales              | .250  | .168 | .814  | -.26 | .76  |
|                   | Northern Territory           | .600  | .242 | .210  | -.14 | 1.34 |
|                   | Queensland                   | .120  | .170 | .997  | -.40 | .64  |
|                   | South Australia              | .232  | .169 | .869  | -.28 | .75  |
|                   | Victoria                     | .137  | .173 | .993  | -.39 | .66  |
|                   | Western Australia            | .280  | .182 | .786  | -.28 | .84  |
| Victoria          | Australian Capital Territory | .063  | .188 | 1.000 | -.51 | .63  |
|                   | New South Wales              | .113  | .068 | .721  | -.10 | .32  |
|                   | Northern Territory           | .463  | .188 | .214  | -.11 | 1.03 |
|                   | Queensland                   | -.017 | .073 | 1.000 | -.24 | .20  |
|                   | South Australia              | .094  | .070 | .876  | -.12 | .31  |
|                   | Tasmania                     | -.137 | .173 | .993  | -.66 | .39  |
|                   | Western Australia            | .143  | .098 | .828  | -.16 | .44  |
| Western Australia | Australian Capital Territory | -.080 | .196 | 1.000 | -.68 | .52  |
|                   | New South Wales              | -.030 | .089 | 1.000 | -.30 | .24  |
|                   | Northern Territory           | .320  | .196 | .731  | -.28 | .92  |
|                   | Queensland                   | -.160 | .092 | .667  | -.44 | .12  |
|                   | South Australia              | -.048 | .090 | .999  | -.32 | .23  |

|                                     |                                 |                                 |       |       |       |      |      |
|-------------------------------------|---------------------------------|---------------------------------|-------|-------|-------|------|------|
|                                     |                                 | Tasmania                        | -.280 | .182  | .786  | -.84 | .28  |
|                                     |                                 | Victoria                        | -.143 | .098  | .828  | -.44 | .16  |
| compliance with ASC<br>ST guideline | Australian Capital<br>Territory | New South Wales                 | .327  | .214  | .793  | -.33 | .98  |
|                                     |                                 | Northern Territory              | .200  | .296  | .998  | -.70 | 1.10 |
|                                     |                                 | Queensland                      | .240  | .216  | .954  | -.42 | .90  |
|                                     |                                 | South Australia                 | .579  | .215  | .127  | -.08 | 1.23 |
|                                     |                                 | Tasmania                        | .000  | .283  | 1.000 | -.86 | .86  |
|                                     |                                 | Victoria                        | .353  | .219  | .744  | -.32 | 1.02 |
|                                     |                                 | Western Australia               | .560  | .229  | .224  | -.14 | 1.26 |
|                                     | New South Wales                 | Australian Capital<br>Territory | -.327 | .214  | .793  | -.98 | .33  |
|                                     |                                 | Northern Territory              | -.127 | .214  | .999  | -.78 | .53  |
|                                     |                                 | Queensland                      | -.087 | .071  | .924  | -.30 | .13  |
|                                     |                                 | South Australia                 | .252* | .066  | .004  | .05  | .45  |
|                                     |                                 | Tasmania                        | -.327 | .196  | .710  | -.93 | .27  |
|                                     |                                 | Victoria                        | .026  | .080  | 1.000 | -.22 | .27  |
|                                     |                                 | Western Australia               | .233  | .104  | .332  | -.08 | .55  |
| Northern Territory                  | Australian Capital<br>Territory | -.200                           | .296  | .998  | -1.10 | .70  |      |
|                                     | New South Wales                 | .127                            | .214  | .999  | -.53  | .78  |      |
|                                     | Queensland                      | .040                            | .216  | 1.000 | -.62  | .70  |      |
|                                     | South Australia                 | .379                            | .215  | .644  | -.28  | 1.03 |      |
|                                     | Tasmania                        | -.200                           | .283  | .997  | -1.06 | .66  |      |
|                                     | Victoria                        | .153                            | .219  | .997  | -.52  | .82  |      |
|                                     | Western Australia               | .360                            | .229  | .767  | -.34  | 1.06 |      |

|                 |                              |        |      |       |       |      |
|-----------------|------------------------------|--------|------|-------|-------|------|
| Queensland      | Australian Capital Territory | -.240  | .216 | .954  | -.90  | .42  |
|                 | New South Wales              | .087   | .071 | .924  | -.13  | .30  |
|                 | Northern Territory           | -.040  | .216 | 1.000 | -.70  | .62  |
|                 | South Australia              | .339*  | .072 | .000  | .12   | .56  |
|                 | Tasmania                     | -.240  | .198 | .929  | -.85  | .37  |
|                 | Victoria                     | .113   | .085 | .887  | -.15  | .37  |
|                 | Western Australia            | .320   | .108 | .064  | -.01  | .65  |
| South Australia | Australian Capital Territory | -.579  | .215 | .127  | -1.23 | .08  |
|                 | New South Wales              | -.252* | .066 | .004  | -.45  | -.05 |
|                 | Northern Territory           | -.379  | .215 | .644  | -1.03 | .28  |
|                 | Queensland                   | -.339* | .072 | .000  | -.56  | -.12 |
|                 | Tasmania                     | -.579  | .197 | .068  | -1.18 | .02  |
|                 | Victoria                     | -.226  | .081 | .102  | -.47  | .02  |
|                 | Western Australia            | -.019  | .105 | 1.000 | -.34  | .30  |
| Tasmania        | Australian Capital Territory | .000   | .283 | 1.000 | -.86  | .86  |
|                 | New South Wales              | .327   | .196 | .710  | -.27  | .93  |
|                 | Northern Territory           | .200   | .283 | .997  | -.66  | 1.06 |
|                 | Queensland                   | .240   | .198 | .929  | -.37  | .85  |
|                 | South Australia              | .579   | .197 | .068  | -.02  | 1.18 |
|                 | Victoria                     | .353   | .202 | .655  | -.26  | .97  |
|                 | Western Australia            | .560   | .213 | .147  | -.09  | 1.21 |
| Victoria        | Australian Capital Territory | -.353  | .219 | .744  | -1.02 | .32  |



|                                  |                              |                              |       |      |       |       |     |
|----------------------------------|------------------------------|------------------------------|-------|------|-------|-------|-----|
|                                  |                              | New South Wales              | -.026 | .080 | 1.000 | -.27  | .22 |
|                                  |                              | Northern Territory           | -.153 | .219 | .997  | -.82  | .52 |
|                                  |                              | Queensland                   | -.113 | .085 | .887  | -.37  | .15 |
|                                  |                              | South Australia              | .226  | .081 | .102  | -.02  | .47 |
|                                  |                              | Tasmania                     | -.353 | .202 | .655  | -.97  | .26 |
|                                  |                              | Western Australia            | .207  | .114 | .612  | -.14  | .56 |
|                                  | Western Australia            | Australian Capital Territory | -.560 | .229 | .224  | -1.26 | .14 |
|                                  |                              | New South Wales              | -.233 | .104 | .332  | -.55  | .08 |
|                                  |                              | Northern Territory           | -.360 | .229 | .767  | -1.06 | .34 |
|                                  |                              | Queensland                   | -.320 | .108 | .064  | -.65  | .01 |
|                                  |                              | South Australia              | .019  | .105 | 1.000 | -.30  | .34 |
|                                  |                              | Tasmania                     | -.560 | .213 | .147  | -1.21 | .09 |
|                                  |                              | Victoria                     | -.207 | .114 | .612  | -.56  | .14 |
| compliance with ASC PA guideline | Australian Capital Territory | New South Wales              | .096  | .128 | .995  | -.30  | .49 |
|                                  |                              | Northern Territory           | .200  | .177 | .951  | -.34  | .74 |
|                                  |                              | Queensland                   | .080  | .130 | .999  | -.32  | .48 |
|                                  |                              | South Australia              | .095  | .129 | .996  | -.30  | .49 |
|                                  |                              | Tasmania                     | .000  | .170 | 1.000 | -.52  | .52 |
|                                  |                              | Victoria                     | .059  | .131 | 1.000 | -.34  | .46 |
|                                  |                              | Western Australia            | .080  | .137 | .999  | -.34  | .50 |
|                                  | New South Wales              | Australian Capital Territory | -.096 | .128 | .995  | -.49  | .30 |
|                                  |                              | Northern Territory           | .104  | .128 | .993  | -.29  | .50 |
|                                  |                              | Queensland                   | -.016 | .042 | 1.000 | -.15  | .11 |
|                                  |                              | South Australia              | -.001 | .040 | 1.000 | -.12  | .12 |



|                   |                              |       |      |       |      |      |
|-------------------|------------------------------|-------|------|-------|------|------|
|                   | Western Australia            | -.015 | .063 | 1.000 | -.21 | .18  |
| Tasmania          | Australian Capital Territory | .000  | .170 | 1.000 | -.52 | .52  |
|                   | New South Wales              | .096  | .118 | .992  | -.26 | .46  |
|                   | Northern Territory           | .200  | .170 | .938  | -.32 | .72  |
|                   | Queensland                   | .080  | .119 | .998  | -.28 | .44  |
|                   | South Australia              | .095  | .118 | .993  | -.27 | .45  |
|                   | Victoria                     | .059  | .121 | 1.000 | -.31 | .43  |
|                   | Western Australia            | .080  | .128 | .998  | -.31 | .47  |
| Victoria          | Australian Capital Territory | -.059 | .131 | 1.000 | -.46 | .34  |
|                   | New South Wales              | .037  | .048 | .994  | -.11 | .18  |
|                   | Northern Territory           | .141  | .131 | .962  | -.26 | .54  |
|                   | Queensland                   | .021  | .051 | 1.000 | -.13 | .18  |
|                   | South Australia              | .036  | .049 | .996  | -.11 | .18  |
|                   | Tasmania                     | -.059 | .121 | 1.000 | -.43 | .31  |
|                   | Western Australia            | .021  | .068 | 1.000 | -.19 | .23  |
| Western Australia | Australian Capital Territory | -.080 | .137 | .999  | -.50 | .34  |
|                   | New South Wales              | .016  | .062 | 1.000 | -.17 | .21  |
|                   | Northern Territory           | .120  | .137 | .988  | -.30 | .54  |
|                   | Queensland                   | .000  | .065 | 1.000 | -.20 | .20  |
|                   | South Australia              | .015  | .063 | 1.000 | -.18 | .21  |
|                   | Tasmania                     | -.080 | .128 | .998  | -.47 | .31  |
|                   | Victoria                     | -.021 | .068 | 1.000 | -.23 | .19  |
|                   | New South Wales              | .713  | .409 | .657  | -.53 | 1.96 |

|                          |                              |                              |        |      |       |       |      |
|--------------------------|------------------------------|------------------------------|--------|------|-------|-------|------|
| number of guidelines met | Australian Capital Territory | Northern Territory           | .800   | .565 | .849  | -.92  | 2.52 |
|                          |                              | Queensland                   | .467   | .412 | .950  | -.79  | 1.72 |
|                          |                              | South Australia              | 1.147  | .410 | .098  | -.10  | 2.40 |
|                          |                              | Tasmania                     | -.200  | .541 | 1.000 | -1.85 | 1.45 |
|                          |                              | Victoria                     | .565   | .418 | .879  | -.71  | 1.84 |
|                          |                              | Western Australia            | 1.080  | .437 | .212  | -.25  | 2.41 |
|                          | New South Wales              | Australian Capital Territory | -.713  | .409 | .657  | -1.96 | .53  |
|                          |                              | Northern Territory           | .087   | .409 | 1.000 | -1.16 | 1.33 |
|                          |                              | Queensland                   | -.247  | .135 | .604  | -.66  | .17  |
|                          |                              | South Australia              | .434*  | .127 | .016  | .05   | .82  |
|                          |                              | Tasmania                     | -.913  | .375 | .227  | -2.06 | .23  |
|                          |                              | Victoria                     | -.149  | .153 | .978  | -.61  | .32  |
|                          | Northern Territory           | Western Australia            | .367   | .199 | .591  | -.24  | .97  |
|                          |                              | Australian Capital Territory | -.800  | .565 | .849  | -2.52 | .92  |
|                          |                              | New South Wales              | -.087  | .409 | 1.000 | -1.33 | 1.16 |
|                          |                              | Queensland                   | -.333  | .412 | .993  | -1.59 | .92  |
|                          |                              | South Australia              | .347   | .410 | .990  | -.90  | 1.60 |
|                          |                              | Tasmania                     | -1.000 | .541 | .587  | -2.65 | .65  |
|                          | Queensland                   | Victoria                     | -.235  | .418 | .999  | -1.51 | 1.04 |
|                          |                              | Western Australia            | .280   | .437 | .998  | -1.05 | 1.61 |
|                          |                              | Australian Capital Territory | -.467  | .412 | .950  | -1.72 | .79  |
|                          |                              | New South Wales              | .247   | .135 | .604  | -.17  | .66  |
|                          |                              | Northern Territory           | .333   | .412 | .993  | -.92  | 1.59 |

|                 |                              |         |      |       |       |      |
|-----------------|------------------------------|---------|------|-------|-------|------|
|                 | South Australia              | .681*   | .138 | .000  | .26   | 1.10 |
|                 | Tasmania                     | -.667   | .379 | .648  | -1.82 | .49  |
|                 | Victoria                     | .098    | .162 | .999  | -.40  | .59  |
|                 | Western Australia            | .613    | .206 | .062  | -.02  | 1.24 |
| South Australia | Australian Capital Territory | -1.147  | .410 | .098  | -2.40 | .10  |
|                 | New South Wales              | -.434*  | .127 | .016  | -.82  | -.05 |
|                 | Northern Territory           | -.347   | .410 | .990  | -1.60 | .90  |
|                 | Queensland                   | -.681*  | .138 | .000  | -1.10 | -.26 |
|                 | Tasmania                     | -1.347* | .376 | .009  | -2.49 | -.20 |
|                 | Victoria                     | -.583*  | .155 | .005  | -1.06 | -.11 |
|                 | Western Australia            | -.067   | .201 | 1.000 | -.68  | .54  |
| Tasmania        | Australian Capital Territory | .200    | .541 | 1.000 | -1.45 | 1.85 |
|                 | New South Wales              | .913    | .375 | .227  | -.23  | 2.06 |
|                 | Northern Territory           | 1.000   | .541 | .587  | -.65  | 2.65 |
|                 | Queensland                   | .667    | .379 | .648  | -.49  | 1.82 |
|                 | South Australia              | 1.347*  | .376 | .009  | .20   | 2.49 |
|                 | Victoria                     | .765    | .385 | .494  | -.41  | 1.94 |
|                 | Western Australia            | 1.280*  | .406 | .037  | .04   | 2.52 |
| Victoria        | Australian Capital Territory | -.565   | .418 | .879  | -1.84 | .71  |
|                 | New South Wales              | .149    | .153 | .978  | -.32  | .61  |
|                 | Northern Territory           | .235    | .418 | .999  | -1.04 | 1.51 |
|                 | Queensland                   | -.098   | .162 | .999  | -.59  | .40  |
|                 | South Australia              | .583*   | .155 | .005  | .11   | 1.06 |

|                   |                              |         |      |       |       |      |
|-------------------|------------------------------|---------|------|-------|-------|------|
|                   | Tasmania                     | -0.765  | .385 | .494  | -1.94 | .41  |
|                   | Western Australia            | .515    | .218 | .263  | -.15  | 1.18 |
| Western Australia | Australian Capital Territory | -1.080  | .437 | .212  | -2.41 | .25  |
|                   | New South Wales              | -.367   | .199 | .591  | -.97  | .24  |
|                   | Northern Territory           | -.280   | .437 | .998  | -1.61 | 1.05 |
|                   | Queensland                   | -.613   | .206 | .062  | -1.24 | .02  |
|                   | South Australia              | .067    | .201 | 1.000 | -.54  | .68  |
|                   | Tasmania                     | -1.280* | .406 | .037  | -2.52 | -.04 |
|                   | Victoria                     | -.515   | .218 | .263  | -1.18 | .15  |

\*. The mean difference is significant at the 0.05 level.

**ANOVA meeting Guidelines by SES**

|                                     |                   | <b>ANOVA</b>      |     |                |       |      |
|-------------------------------------|-------------------|-------------------|-----|----------------|-------|------|
|                                     |                   | Sum of<br>Squares | df  | Mean<br>Square | F     | Sig. |
| compliance with BSC<br>ST guideline | Between<br>Groups | 3.717             | 2   | 1.858          | 9.206 | .000 |
|                                     | Within Groups     | 63.788            | 316 | .202           |       |      |
|                                     | Total             | 67.505            | 318 |                |       |      |
| compliance with BSC<br>PA guideline | Between<br>Groups | .268              | 2   | .134           | .909  | .404 |
|                                     | Within Groups     | 46.547            | 316 | .147           |       |      |
|                                     | Total             | 46.815            | 318 |                |       |      |
| compliance with ASC<br>ST guideline | Between<br>Groups | 1.400             | 2   | .700           | 2.956 | .053 |
|                                     | Within Groups     | 74.832            | 316 | .237           |       |      |
|                                     | Total             | 76.232            | 318 |                |       |      |
| compliance with ASC<br>PA guideline | Between<br>Groups | .146              | 2   | .073           | 1.007 | .366 |
|                                     | Within Groups     | 22.895            | 316 | .072           |       |      |
|                                     | Total             | 23.041            | 318 |                |       |      |
| number of guidelines<br>met         | Between<br>Groups | 14.879            | 2   | 7.440          | 8.888 | .000 |
|                                     | Within Groups     | 264.506           | 316 | .837           |       |      |
|                                     | Total             | 279.386           | 318 |                |       |      |

### Multiple Comparisons

Tukey HSD

| Dependent Variable                  | (I)<br>SES_Index | (J)<br>SES_Index | Mean<br>Difference (I-<br>J) | Std.<br>Error | Sig. | 95% Confidence Interval |                |
|-------------------------------------|------------------|------------------|------------------------------|---------------|------|-------------------------|----------------|
|                                     |                  |                  |                              |               |      | Lower<br>Bound          | Upper<br>Bound |
| compliance with BSC<br>ST guideline | 1.00             | 2.00             | -.144                        | .066          | .073 | -.30                    | .01            |
|                                     |                  | 3.00             | -.254*                       | .059          | .000 | -.39                    | -.11           |
|                                     | 2.00             | 1.00             | .144                         | .066          | .073 | -.01                    | .30            |
|                                     |                  | 3.00             | -.110                        | .062          | .184 | -.26                    | .04            |
|                                     | 3.00             | 1.00             | .254*                        | .059          | .000 | .11                     | .39            |
|                                     |                  | 2.00             | .110                         | .062          | .184 | -.04                    | .26            |
| compliance with BSC<br>PA guideline | 1.00             | 2.00             | -.028                        | .056          | .875 | -.16                    | .10            |
|                                     |                  | 3.00             | -.067                        | .051          | .378 | -.19                    | .05            |
|                                     | 2.00             | 1.00             | .028                         | .056          | .875 | -.10                    | .16            |
|                                     |                  | 3.00             | -.040                        | .053          | .735 | -.17                    | .09            |
|                                     | 3.00             | 1.00             | .067                         | .051          | .378 | -.05                    | .19            |
|                                     |                  | 2.00             | .040                         | .053          | .735 | -.09                    | .17            |
| compliance with ASC<br>ST guideline | 1.00             | 2.00             | -.014                        | .071          | .977 | -.18                    | .15            |
|                                     |                  | 3.00             | -.141                        | .064          | .074 | -.29                    | .01            |
|                                     | 2.00             | 1.00             | .014                         | .071          | .977 | -.15                    | .18            |
|                                     |                  | 3.00             | -.126                        | .068          | .149 | -.29                    | .03            |
|                                     | 3.00             | 1.00             | .141                         | .064          | .074 | -.01                    | .29            |
|                                     |                  | 2.00             | .126                         | .068          | .149 | -.03                    | .29            |
| compliance with ASC<br>PA guideline | 1.00             | 2.00             | .017                         | .039          | .899 | -.08                    | .11            |
|                                     |                  | 3.00             | -.034                        | .036          | .613 | -.12                    | .05            |



|                          |      |      |  |  |  |  |  |  |
|--------------------------|------|------|--|--|--|--|--|--|
|                          | 2.00 | 1.00 |  |  |  |  |  |  |
|                          |      | 3.00 |  |  |  |  |  |  |
|                          | 3.00 | 1.00 |  |  |  |  |  |  |
|                          |      | 2.00 |  |  |  |  |  |  |
| number of guidelines met | 1.00 | 2.00 |  |  |  |  |  |  |
|                          |      | 3.00 |  |  |  |  |  |  |
|                          | 2.00 | 1.00 |  |  |  |  |  |  |
|                          |      | 3.00 |  |  |  |  |  |  |
|                          | 3.00 | 1.00 |  |  |  |  |  |  |
|                          |      | 2.00 |  |  |  |  |  |  |

\*. The mean difference is significant at the 0.05 level.
